# Supplementary material
Source: publisher site journal article supplement (https://www.dovepress.com/article/424128)
Supplement: Supplementary file 1 [file get_supplementary_file.php]

**Supplementary table S1**

**COPD Consensus Delphi 1st Survey Questionnaire**

**Reduction of exacerbations with single inhaler triple therapy in COPD**

| **S.No.** | **Questions** | **Response** |
| --- | --- | --- |
| 1 | Do you agree that past history of exacerbations in a COPD patient is an important predictor of future exacerbations and hence can identify patients who would benefit from triple therapy? | **1 2 3 4 5 6 7 8 9**  **Strongly Disagree Strongly Agree** |
| 2 | Do you agree that single inhaler triple therapy is more effective than open triple therapy in reducing the risk exacerbations in patients with COPD? | **1 2 3 4 5 6 7 8 9**  **Strongly Disagree Strongly Agree** |
| 3 | Do you agree that patients with COPD identify and report exacerbations early enough to the doctors? | **1 2 3 4 5 6 7 8 9**  **Strongly Disagree Strongly Agree** |
| 4 | What is the minimum number of SEVERE exacerbations in the past 12 months according to you that necessitates the initiation of triple therapy in a COPD patient? | **OPEN RESPONSE**  **0, 1, 2, 3, 4, 5 or more** |
| 5 | What is the minimum number of MODERATE exacerbations in the past 12 months according to you that necessitates the initiation of triple therapy in a COPD patient? | **OPEN RESPONSE**  **0, 1, 2, 3, 4, 5 or more** |

**Early optimization with single inhaler triple therapy in COPD**

| **S.No.** | **Questions** | **Response** |
| --- | --- | --- |
| 1 | Do you agree to initiate single inhaler triple therapy as a first-line therapy in patients who are diagnosed with COPD for the first time because of hospitalization or visit to the Emergency due to an exacerbation? | **1 2 3 4 5 6 7 8 9**  **Strongly Disagree Strongly Agree** |
| 2 | Do you agree that initiating single inhaler triple therapy within 30 days of discharge from the Emergency or hospitalization due to an exacerbation can reduce health care costs and future exacerbation risk compared with late initiation (>30 days)? | **1 2 3 4 5 6 7 8 9**  **Strongly Disagree Strongly Agree** |
| 3 | Do you think single Inhaler triple therapy can be considered in a patient with COPD with a high blood eosinophil count? | **1 2 3 4 5 6 7 8 9**  **Strongly Disagree Strongly Agree** |
| 4 | Do you agree that single inhaler triple therapy can be considered as the treatment of choice for symptomatic COPD without exacerbation history? | **1 2 3 4 5 6 7 8 9**  **Strongly Disagree Strongly Agree** |
| 5 | What is the minimum blood eosinophil level that you consider as high? | **OPEN RESPONSE**  >50, >100, >150, >200, > 250, > 300, > 400 cells/uL |
| 6 | Do you agree that the following target patient population would benefit the most with early treatment with single inhaler triple therapy instead of bronchodilator(s) alone?  Elderly patients? | **1 2 3 4 5 6 7 8 9**  **Strongly Disagree Strongly Agree** |
| 7 | Do you agree that the following target patient population would benefit the most with early treatment with single inhaler triple therapy instead of bronchodilator(s) alone?  Patients experiencing more frequent exacerbations in the previous year | - Patients experiencing more frequent exacerbations in the previous year    **1 2 3 4 5 6 7 8 9**  **Strongly Disagree Strongly Agree** |
| 8 | Do you agree that the following target patient population would benefit the most with early treatment with single inhaler triple therapy instead of bronchodilator(s) alone?  Patients with higher degree of dyspnea + cough and sputum | **1 2 3 4 5 6 7 8 9**  **Strongly Disagree Strongly Agree** |

**Pneumonia risk with single inhaler triple therapy in COPD**

| **S.No.** | **Questions** | **Response** |
| --- | --- | --- |
| 1 | Do you agree that there is similar degree of pneumonia risk while using single inhaler triple therapy vs open triple therapy? | **1 2 3 4 5 6 7 8 9**  **Strongly Disagree Strongly Agree** |
| 2 | Do you agree that all single inhaler triple therapies are associated with similar degree of pneumonia risk? | **1 2 3 4 5 6 7 8 9**  **Strongly Disagree Strongly Agree** |
| 3 | Do you agree that the risk of pneumonia is ICS dose dependent? | **1 2 3 4 5 6 7 8 9**  **Strongly Disagree Strongly Agree** |
| 4 | Do you agree with the following statement?  “I am concerned about the risk of pneumonia while prescribing triple therapy in patients with COPD” | **1 2 3 4 5 6 7 8 9**  **Strongly Disagree Strongly Agree** |
| 5 | Do you agree that the following factors contribute to the risk of pneumonia in a patient with COPD?  **Current smokers** | **1 2 3 4 5 6 7 8 9**  **Strongly Disagree Strongly Agree** |
| 6 | Do you agree that the following factors contribute to the risk of pneumonia in a patient with COPD?  **Female sex** | **1 2 3 4 5 6 7 8 9**  **Strongly Disagree Strongly Agree** |
| 7 | Do you agree that the following factors contribute to the risk of pneumonia in a patient with COPD?  **Age >55 years** | **1 2 3 4 5 6 7 8 9**  **Strongly Disagree Strongly Agree** |
| 8 | Do you agree that the following factors contribute to the risk of pneumonia in a patient with COPD?  **Patients with diabetes mellitus** | **1 2 3 4 5 6 7 8 9**  **Strongly Disagree Strongly Agree** |
| 9 | Do you agree that the following factors contribute to the risk of pneumonia in a patient with COPD?  **History of prior exacerbation or pneumonia** | **1 2 3 4 5 6 7 8 9**  **Strongly Disagree Strongly Agree** |
| 10 | Do you agree that the following factors contribute to the risk of pneumonia in a patient with COPD?  **BMI<25 kg/m2** | **1 2 3 4 5 6 7 8 9**  **Strongly Disagree Strongly Agree** |
| 11 | Do you agree that the following factors contribute to the risk of pneumonia in a patient with COPD?  **Concurrent statin therapy** | **1 2 3 4 5 6 7 8 9**  **Strongly Disagree Strongly Agree** |
| 12 | Do you agree that the following factors contribute to the risk of pneumonia in a patient with COPD?  **Poor MRC dyspnea grade** | **1 2 3 4 5 6 7 8 9**  **Strongly Disagree Strongly Agree** |
| 13 | Do you agree that the following factors contribute to the risk of pneumonia in a patient with COPD?  **Severe airflow limitation** | **1 2 3 4 5 6 7 8 9**  **Strongly Disagree Strongly Agree** |

**Effect of single inhaler triple therapy on the risk of mortality in COPD**

| **S.No.** | **Questions** | **Response** |
| --- | --- | --- |
| 1 | Do you agree that moderate-severe exacerbations in COPD increase the risk of mortality? | **1** **2** **3 4 5 6 7 8 9**  **Strongly Disagree Strongly Agree** |
| 2 | Do you agree that the improvements in all-cause mortality found in the clinical studies with single inhaler triple therapy are also seen in the real life practice? | **1 2 3 4 5 6 7 8 9**  **Strongly Disagree Strongly Agree** |
| 3 | To what extent you consider the importance of reducing the risk of mortality in your decision to prescribe triple therapy? | **1 2 3 4 5 6 7 8 9**  **Not at all important Very Important** |
| 4 | What baseline characteristics of the COPD patients do you think may be the risk factors for increased mortality? | **OPEN RESPONSE** |
| 5 | Do you agree single inhaler triple therapy improves COPD patients’ survival compared to dual LABA/LAMA therapy? | **1 2 3 4 5 6 7 8 9**  **Strongly Disagree Strongly Agree** |

**COPD Consensus Delphi 2nd Survey Questionnaire**

**Reduction of exacerbations with single inhaler triple therapy in COPD**

| **S.No.** | **Questions** | **Response** |
| --- | --- | --- |
| 1 | Do you agree that single inhaler triple therapy is more effective than open triple therapy in reducing the risk exacerbations in patients with COPD? | **1 2 3 4 5 6 7 8 9**  **Strongly Disagree Strongly Agree** |
| 2 | Do you agree that patients with COPD identify and report exacerbations early enough to the doctors? | **1 2 3 4 5 6 7 8 9**  **Strongly Disagree Strongly Agree** |

**Early optimization with single inhaler triple therapy in COPD**

| **S.No.** | **Questions** | **Response** |
| --- | --- | --- |
| 1 | Do you agree to initiate single inhaler triple therapy as a first-line therapy in patients who are diagnosed with COPD for the first time because of hospitalization or visit to the Emergency due to an exacerbation? | **1 2 3 4 5 6 7 8 9**  **Strongly Disagree Strongly Agree** |
| 2 | Do you agree that single inhaler triple therapy must be considered as the treatment of choice for symptomatic COPD without exacerbation history? | **1 2 3 4 5 6 7 8 9**  **Strongly Disagree Strongly Agree** |
| 3 | Do you agree that the following target patient population would benefit the most with early treatment with single inhaler triple therapy instead of bronchodilator(s) alone?  - Elderly patients | **1 2 3 4 5 6 7 8 9**  **Strongly Disagree Strongly Agree** |
| 4 | Do you agree that the following target patient population would benefit the most with early treatment with single inhaler triple therapy instead of bronchodilator(s) alone?  - Patients with higher degree of dyspnea + cough and sputum | **1 2 3 4 5 6 7 8 9**  **Strongly Disagree Strongly Agree** |

**Pneumonia risk with single inhaler triple therapy in COPD**

| **S.No.** | **Questions** | **Response** |
| --- | --- | --- |
| 1 | Do you agree that all single inhaler triple therapies are associated with similar degree of pneumonia risk? | **1 2 3 4 5 6 7 8 9**  **Strongly Disagree Strongly Agree** |
| 2 | Do you agree with the following statement?  “I sometimes refrain from prescribing single inhaler triple therapy due to the risk of pneumonia in patients with COPD” | **1 2 3 4 5 6 7 8 9**  **Strongly Disagree Strongly Agree** |
| 3 | Do you agree that the following factors contribute to the risk of pneumonia in a patient with COPD?  **Female sex** | **1 2 3 4 5 6 7 8 9**  **Strongly Disagree Strongly Agree** |
| 4 | Do you agree that the following factors contribute to the risk of pneumonia in a patient with COPD?  **Older age** | **1 2 3 4 5 6 7 8 9**  **Strongly Disagree Strongly Agree** |
| 5 | Do you agree that the following factors contribute to the risk of pneumonia in a patient with COPD?  **Patients with diabetes mellitus** | **1 2 3 4 5 6 7 8 9**  **Strongly Disagree Strongly Agree** |
| 6 | Do you agree that the following factors contribute to the risk of pneumonia in a patient with COPD?  **Lower BMI** | **1 2 3 4 5 6 7 8 9**  **Strongly Disagree Strongly Agree** |
| 7 | Do you agree that the following factors contribute to the risk of pneumonia in a patient with COPD?  **Concurrent statin therapy** | **1 2 3 4 5 6 7 8 9**  **Strongly Disagree Strongly Agree** |
| 8 | Do you agree that the following factors contribute to the risk of pneumonia in a patient with COPD?  **Higher level of dyspnea** | **1 2 3 4 5 6 7 8 9**  **Strongly Disagree Strongly Agree** |
